# Supplementary material for: G Turton, Evidential Uncertainty in Causation in Negligence (Hart Publishing 2016). 245 + ix pp. ISBN 978-1-84946-704-9 (Hart Studies in Private Law vol 15). £55.00 (hardback).
Source: publisher site journal article supplement (doi:10.1515/jetl-2018-0117), 2018-12-17
Supplement: Supplementary file 1 [file Announcement.pdf]

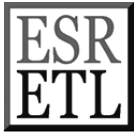

European Centre of Tort and Insurance Law  
Institute for European Tort Law

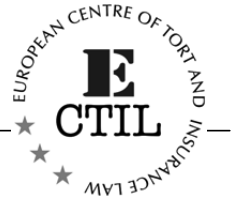

## 18th Annual Conference on European Tort Law (ACET)

From April 25 to April 27, 2019, the Institute for European Tort Law (ETL) and the European Centre of Tort and Insurance Law (ECTIL) will host the 18th Annual Conference on European Tort Law in Vienna. The Conference will highlight the main developments in tort law in Europe in 2018 and allow discussion of their implications.

On Thursday evening (April 25, 2019), the Conference will begin with an opening lecture by Mark Lunney (Armidale, Australia) on "Common Law Codification of Tort Law", followed by a reception at the Austrian Supreme Court (Palace of Justice). On Friday (April 26, 2019), scholars from EU Member States, plus Norway and Switzerland, will report on the latest developments in the field of tort law in their respective jurisdictions. A brief comparative overview of the principal themes to emerge and a presentation of developments at European Union level will also be provided.

The Conference will continue on Saturday morning (April 27, 2019) with a special session on 'Human Rights' Violations in Global Supply Chains'. In this special session, chaired by Martin Spitzer (Vienna), the panelists – Mark A. Geistfeld (New York, USA), James Cabrelli (Edinburgh, UK) and Franz Werro (Fribourg, Switzerland) will discuss the role tort law can play in combatting exploitation and violations of basic human rights within the framework of global production processes.

Revised and expanded reports on developments in each jurisdiction will be published in the Yearbook 'European Tort Law 2018'. Revised versions of the lectures from the Saturday morning session will be published as a special issue of the Journal of European Tort Law.

Conference fee: € 600 (including a copy of the 2018 Yearbook)

Early booking discount for registration by February 28, 2019: € 500

Supporting members: € 300 (including a copy of the 2018 Yearbook)

Early booking discount for registration by February 28, 2019: € 250

University staff, judges: € 120 (Conference only; Yearbook copy optional at approx. € 95)

Early booking discount for registration by February 28, 2019: € 100

Jurists in training: € 60 (Conference only; Yearbook copy optional at approx. € 95)

Early booking discount for registration by February 28, 2019: € 50

The fee includes the Conference materials, evening reception on Thursday, buffet lunch on Friday, and refreshments during the Conference.

### For further information and registration contact:

European Centre of Tort and Insurance Law (ECTIL)  
Reichsratsstrasse 17/2, A-1010 Vienna, Austria  
Tel. (0043 1) 4277 29650; Fax (0043 1) 4277 29670  
Email [ectil@ectil.org](mailto:ectil@ectil.org)  
<http://www.ectil.org>

Institute for European Tort Law (ETL)  
Reichsratsstrasse 17/2, A-1010 Vienna, Austria  
Tel. (0043 1) 4277 29651; Fax (0043 1) 4277 29670  
Email [etl@oeaw.ac.at](mailto:etl@oeaw.ac.at)  
<http://www.etl.oeaw.ac.at>
